# Supplementary material
Source: HighWire-hosted journal article supplement (http://www.qdcxjkg.com/highwire/filestream/130978/field_highwire_adjunct_files/0/ERJ-00220-2016_Suppl.pdf)
Supplement: ERJ-00220-2016_Suppl.pdf [file ERJ-00220-2016_Suppl.pdf]

## Supplementary material 1

### **A 1-day-visit in a severe asthma centre; effect on asthma control, QOL and healthcare use**

A.N. van der Meer<sup>1</sup>, H. Pasma<sup>1</sup>, W. Kempenaar<sup>1</sup>, J. Pelinck<sup>2</sup>, M. Schutten<sup>3</sup>, H. Storm<sup>4</sup>, A. ten Brinke<sup>1</sup>

#### **One-day-visit program in detail**

##### Information requested at referral

1. Referral letter
2. Asthma-related medical correspondence of the last five years, including ENT correspondence, CT-sinus and HRCT.
3. Lung function:
  - a. All LF data of the last 3 years, including FeNO
  - b. Results methacholine/histamine provocation test ever
4. Laboratory: Results on total IgE, leucocytes, cell differential, RAST or skin prick test of the last 2 years

At home completed questionnaires (1 day before visit):

1. Patients own questions and expectations
2. Asthma control questionnaire (ACQ) (1)
3. Asthma quality of life questionnaire (AQLQ) (2)
4. Healthcare use questionnaire (HCU) (3)
5. Nijmegen hyperventilation questionnaire (4)
6. 4 dimensional symptom questionnaire (4DSQ) (5)
7. Medication list

Intake specialised asthma nurse

1. Welcome and introduction
2. Check at home completed questionnaires
3. Check medication list
4. Check inhalation technique
5. Assessment of compliance (ICS prescription filling  $\geq 80\%$  in previous 12 months (6) and MARS questionnaire (7))
6. Evaluate smoking history, smoke exposure at home or work
7. Assessment level of self-management

Lung function department

1. Length and weight
2. Exhaled NO (8)

3. Spirometry before and after 400 mcg Salbutamol (9)
4. Sputum induction (10)

### Laboratory

1. Leucocytes and cell differential
2. Total IgE, RAST, specific IgEs including aspergillus

### Intake pulmonologist

1. Medical history, general and asthma (using referral information) and current symptoms
2. Confirm asthma diagnosis: symptoms compatible with asthma combined with at least one of the following (previously or at intake) (11)
  - a. Reversibility in FEV<sub>1</sub> after 400 mcg salbutamol ( $\geq 12\%$  predicted and  $> 200$  ml)
  - b. Airway hyperresponsiveness to methacholine/histamine (PC<sub>20</sub>  $< 9.8/8$  mg/ml)
  - c. Decrease of FEV<sub>1</sub>  $> 12\%$  predicted at tapering of asthma medication
3. Consider alternative or overlapping diagnoses
4. Check high intensity treatment:  $\geq 1000$  mcg/day fluticasone equivalent + LABA or other controller, with or without OCS
5. Check whether asthma is uncontrolled:  $\geq 1$  out of 2
  - a. ACQ  $\geq 1.5$
  - b.  $\geq 2$  exacerbations previous year

Or asthma only controlled with maintenance systemic steroids

6. Check ongoing exposition to allergens or other triggering factors
7. Check medication potentially worsening asthma
8. Check comorbidities (rhinosinusitis/nasal polyps, GER, obesity, OSAS, vocal cord dysfunction/dysfunctional breathing) by questioning and using referral information
9. Check side effects asthma medication

#### Intake physiotherapist

1. Assessment of daily activity level
2. Evaluate previous programs rehabilitation / breathing technique
3. 6-minute walking test (12)
4. Likelihood of hyperventilation/dysfunctional breathing (questionnaire and observation)

#### Intake clinical psychologist

1. Psychosocial factors potentially contributing to poor control
2. Distress, depression, anxiety, somatisation (4DSQ) or other psychological factors contributing to poor control
3. Coping

#### Multidisciplinary team discussion

1. Truly asthma?

2. Uncontrolled despite high intensity treatment? Or controlled with daily OCS
3. Contributing factors/comorbidities
4. Initial determination of asthma phenotype (based on age at onset, atopic status and presence/absence of eosinophilic inflammation)
5. Patients own questions/expectations
6. Personalised management plan (for details see online supplementary 2)

Final extensive explanatory session with the patient (by pulmonologist), focusing on

1. Is it truly/only asthma?
2. Which factors might contribute to poor control? What can be done regarding these factors
3. What subtype of asthma? Explanation and specific advices for this subtype
4. Summary of advices for patient and referring doctor
5. Patients own questions/expectations answered?
6. Referral back to own pulmonologist

## **Reference List**

1. Juniper EF, O'Byrne PM, Guyatt GH, Ferrie PJ, King DR. Development and validation of a questionnaire to measure asthma control. The European respiratory journal. 1999;14:902-7.
2. Juniper EF, Svensson K, Mörk AC, Ståhl E. Modification of the asthma quality of life

questionnaire (standardised) for patients 12 years and older. *Health Qual Life Outcomes*. 2005;3:58.

3. ten Brinke A, Ouwerkerk ME, Zwinderman AH, Spinhoven P, Bel EH. Psychopathology in patients with severe asthma is associated with increased health care utilization. *Am J Respir Crit Care Med*. 2001;163:1093-6.
4. van Dixhoorn J, Duivenvoorden HJ. Efficacy of Nijmegen Questionnaire in recognition of the hyperventilation syndrome. *J Psychosom Res*. 1985;29:199-206.
5. Terluin B, van Marwijk HWJ, Adèr HJ, de Vet HC, Penninx BW, Hermens ML, van Boeijen CA, van Balkom AJ, van der Klink JJ, Stalman WA. The Four-Dimensional Symptom Questionnaire (4DSQ): a validation study of a multidimensional self-report questionnaire to assess distress, depression, anxiety and somatization. *BMC Psychiatry* 2006;6:34.
6. McNicholl DM, Stevenson M, McGarvey LP, Heaney LG. The utility of fractional exhaled nitric oxide suppression in the identification of nonadherence in difficult asthma. *American Journal of Respiratory and Critical Care Medicine*, 2012;11:1102-1108.

7. Morisky DE, Ang A, Krousel-Wood M, Ward HJ. Predictive Validity of a Medication Adherence Measure in an Outpatient Setting. *J Clin Hypertens* 2008;10:348-54.
  
8. American Thoracic Society, European Respiratory Society. ATS/ERS recommendations for standardized procedures for the online and offline measurement of exhaled lower respiratory nitric oxide and nasal nitric oxide, 2005. *Am J Respir Crit Care Med.* 2005;171:912-30.
  
9. Quanjer PH, Tammeling GJ, Cotes JE, Pedersen OF, Peslin R, Yernault JC. [Lung volumes and forced ventilatory flows. Work Group on Standardization of Respiratory Function Tests. European Community for Coal and Steel. Official position of the European Respiratory Society]. *Rev Mal Respir.* 1994;11 (Suppl 3):5-40.
  
10. ten Brinke A, de Lange C, Zwinderman, Rabe KF, Sterk PJ, Bel EH. Sputum induction in severe asthma by a standardized protocol: predictors of excessive bronchoconstriction. *Am J Respir Crit Care Med.* 2001;164:749-53.
  
11. Global Initiative for Asthma (GINA) 2015. Global strategy for asthma management and prevention. <http://www.ginasthma.org/>

12. ATS Committee on Proficiency Standards for Clinical Pulmonary Function Laboratories. ATS statement: guidelines for the six-minute walk test. Am J Respir Crit Care Med. 2002;166:111-7.



## Supplementary material 2

### **A 1-day-visit in a severe asthma centre; effect on asthma control, QOL and healthcare use**

A.N. van der Meer<sup>1</sup>, H. Pasma<sup>1</sup>, W. Kempenaar<sup>1</sup>, J. Pelinck<sup>2</sup>, M. Schutten<sup>3</sup>, H. Storm<sup>4</sup>, A. ten Brinke<sup>1</sup>

#### **Report to the referring pulmonologist in detail (assessment and management plan)**

##### General

1. Patient's own questions and expectations
2. Medical history, general and asthma, current symptoms
3. Medication use at intake
4. Confirmation asthma diagnosis
5. Level of asthma control and high intensity treatment

##### Contributing factors

1. Inhalation technique
2. Asthma education / self-management
3. Adherence
4. Alternative or overlapping diagnoses
5. Exposition to allergens or other triggering factors

6. Medication potentially worsening asthma
7. Comorbidities (rhinosinusitis/nasal polyps, GER, obesity, OSAS, vocal cord dysfunction/dysfunctional breathing)
8. Psychological factors

### Symptoms and limitations

1. Asthma Control Questionnaire (ACQ) score
2. Asthma quality of life questionnaire (AQLQ) score
3. Healthcare use questionnaire (HCU)
4. Exercise tolerance: 6-minute walking test

### Phenotype characteristics

1. Atopic status
2. Age-at-onset: early-onset, late-onset
3. Immunomodulatory medication use
4. Inflammatory pattern: blood, sputum, exhaled NO
5. Lung function: airway obstruction, airtrapping, bronchial hyperreactivity

### Conclusion

1. No/difficult-to-treat/severe asthma
2. Factors to optimize
3. Phenotypic characteristics (age-onset, atopic status, inflammation, airway obstruction)

#### 4. Degree of quality of life and healthcare use

##### Personalised management plan

1. If applicable, specific advices on not yet optimised potentially contributing factors
2. Advice regarding optimisation of current medication (increase/decrease doses of ICS or OCS, addition of extra controller medication)
3. When optimised and still uncontrolled, phenotype-specific advices regarding targeted therapies (ea. anti-IgE, maintenance OCS, anti-IL5 (trial or in future), macrolide, bronchial thermoplasty)
